# Supplementary material for: Structural Requirements of N-Substituted Spiropiperidine Analogues as Agonists of Nociceptin/Orphanin FQ Receptor
Source: Int J Mol Sci. 2011 Dec 6;12(12):8961–81. doi: 10.3390/ijms12128961 (PMC3257111; doi:10.3390/ijms12128961)
Supplement: Supplementary file 1 [file ijms-12-08961-s001.pdf]

**Table S1.** Structures of compounds with skeleton type A in the data set.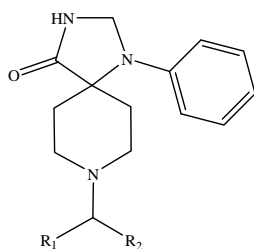

Skeleton type A

| Compound<br>d | R <sub>1</sub>          | R <sub>2</sub> | K <sub>i</sub> (nM) |
|---------------|-------------------------|----------------|---------------------|
| 1             | Ph                      | H              | 11.0                |
| 2             | Cyclohexyl              | H              | 61.2                |
| 3             | 2-Pyridyl               | H              | 119.0               |
| 4             | 3-Pyridyl               | H              | 133.0               |
| 5             | 4-Pyridyl               | H              | 824.0               |
| 6             | 3-Thienyl               | H              | 14.0                |
| 7             | 2-Cl-Ph                 | H              | 3.2                 |
| 8             | 2,6-Cl <sub>2</sub> -Ph | H              | 2.3                 |
| 9             | Ph                      | Me             | 3.5                 |
| 10            | Ph                      | Et             | 17.0                |
| 11            | Ph                      | Propyl         | 2.4                 |
| 12            | Ph                      | Butyl          | 1.1                 |
| 13            | Ph                      | Isoamyl        | 1.5                 |
| 14            | Ph                      | Cyclopentyl    | 4.6                 |
| 15            | Ph                      | Ph             | 23.0                |
| 16            |                         |                | 225.0               |
| 17            |                         |                | 36.5                |
| 18            | 2-F-Ph                  | Ph             | 10.8                |
| 19            | 2-Cl-Ph                 | Ph             | 9.0                 |
| 20            | 2-Me-Ph                 | Ph             | 11.5                |
| 21            | 4-Cl-Ph                 | Ph             | 140.0               |
| 22 #          | 2-Me-Ph                 | 2-Me-Ph        | 9.0                 |
| 23            | 2-Cl-Ph                 | 2-Cl-Ph        | 6.8                 |
| 24            | 3-Cl-Ph                 | 3-Cl-Ph        | 249.0               |
| 25            | 2-F-Ph                  | 2-F-Ph         | 6.3                 |
| 26 #          | 3-F-Ph                  | 3-F-Ph         | 250.0               |
| 27            | 4-F-Ph                  | 4-F-Ph         | 49.0                |

# Molecules belonging to the test set.

**Table S2.** Structures of compounds with skeleton type B in the data set.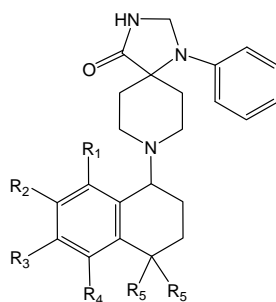

Skeleton type B

| Compound        | R <sub>1</sub> | R <sub>2</sub> | R <sub>3</sub> | R <sub>4</sub> | R <sub>5</sub>  | n | K <sub>i</sub> (nM) |
|-----------------|----------------|----------------|----------------|----------------|-----------------|---|---------------------|
| 28 <sup>#</sup> | H              | H              | H              | H              | H               | 0 | 1.2                 |
| 29              | H              | H              | H              | H              | H               | 1 | 1.4                 |
| 30              | H              | H              | H              | H              | H               | 2 | 14.5                |
| 31              | H              | H              | H              | H              | CH <sub>3</sub> | 1 | 1.3                 |
| 32              | F              | H              | H              | H              | H               | 1 | 0.3                 |
| 33              | H              | F              | H              | H              | H               | 1 | 0.9                 |
| 34              | H              | H              | H              | F              | H               | 1 | 0.8                 |
| 35 <sup>#</sup> | Cl             | H              | H              | H              | H               | 1 | 2.6                 |
| 36 <sup>#</sup> | H              | Cl             | H              | H              | H               | 1 | 10.8                |
| 37 <sup>#</sup> | H              | H              | H              | Cl             | H               | 1 | 2.0                 |
| 38              | H              | H              | Cl             | H              | CH <sub>3</sub> | 1 | 1.4                 |
| 39 <sup>#</sup> | H              | H              | F              | H              | CH <sub>3</sub> | 1 | 8.4                 |
| 40              | H              | Cl             | Cl             | H              | CH <sub>3</sub> | 1 | 15.1                |

<sup>#</sup> Molecules belonging to the test set.

**Table S3.** Structures of compounds with skeleton type C in the data set.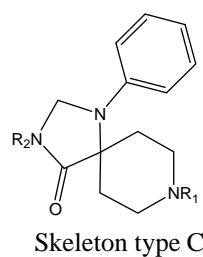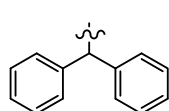

A

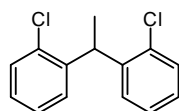

B

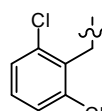

C

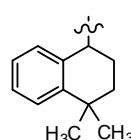

D

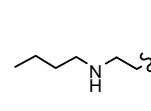

E

| Compound | R <sub>1</sub> | R <sub>2</sub>                                                                      | K <sub>i</sub> (nM) |
|----------|----------------|-------------------------------------------------------------------------------------|---------------------|
| 41       | A              | Me                                                                                  | 31                  |
| 42       | A              | Et                                                                                  | 84                  |
| 43       | A              | Pr                                                                                  | 34                  |
| 44 #     | A              | Bu                                                                                  | 57                  |
| 45       | A              | <i>i</i> -Pr                                                                        | 66                  |
| 46       | A              | <i>c</i> -PrCH <sub>2</sub> -                                                       | 83                  |
| 47       | A              | <i>c</i> -BuCH <sub>2</sub> -                                                       | 53                  |
| 48 #     | A              | <i>c</i> -HexylCH <sub>2</sub> -                                                    | 89                  |
| 49       | A              | Propargyl                                                                           | 234                 |
| 50 #     | A              | Allyl                                                                               | 203                 |
| 51       | B              | Bu-                                                                                 | 48.7                |
| 52       | B              | <i>i</i> -Amyl                                                                      | 56                  |
| 53       | B              | CH <sub>3</sub> OC(O)CH <sub>2</sub> -                                              | 19.5                |
| 54 #     | B              | HO(CH <sub>2</sub> ) <sub>2</sub> -                                                 | 18.5                |
| 55       | B              | MeO(CH <sub>2</sub> ) <sub>2</sub> -                                                | 26                  |
| 56 #     | B              | NH <sub>2</sub> (CH <sub>2</sub> ) <sub>2</sub> -                                   | 47.8                |
| 57 #     | B              | CH <sub>3</sub> NH(CH <sub>2</sub> ) <sub>2</sub> -                                 | 4.05                |
| 58       | B              | EtNH(CH <sub>2</sub> ) <sub>2</sub> -                                               | 2.1                 |
| 59       | B              | <i>i</i> -PrNH(CH <sub>2</sub> ) <sub>2</sub> -                                     | 2.55                |
| 60       | B              | <i>c</i> -PentylNH(CH <sub>2</sub> ) <sub>2</sub> -                                 | 8.65                |
| 61       | B              | <i>c</i> -HexylNH(CH <sub>2</sub> ) <sub>2</sub> -                                  | 5                   |
| 62 #     | B              | (CH <sub>3</sub> ) <sub>2</sub> N(CH <sub>2</sub> ) <sub>2</sub> -                  | 3.5                 |
| 63       | B              | <i>c</i> -PrNH(CH <sub>2</sub> ) <sub>2</sub> -                                     | 3.7                 |
| 64       | B              | ( <i>i</i> -Pr) <sub>2</sub> N(CH <sub>2</sub> ) <sub>2</sub> -                     | 12.1                |
| 65 #     | B              | BuNH(CH <sub>2</sub> ) <sub>2</sub> -                                               | 2.15                |
| 66 #     | B              | <i>i</i> -BuNH(CH <sub>2</sub> ) <sub>2</sub> -                                     | 2.75                |
| 67       | B              | <i>c</i> -HexylCH <sub>2</sub> NH(CH <sub>2</sub> ) <sub>2</sub> -                  | 3.8                 |
| 68       | B              | 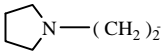 | 2.25                |
| 69       | B              | 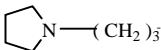 | 3.2                 |
| 70       | B              | 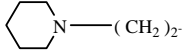 | 8                   |
| 71       | C              | CH <sub>3</sub> NH(CH <sub>2</sub> ) <sub>2</sub> -                                 | 0.8                 |
| 72 #     | C              | EtNH(CH <sub>2</sub> ) <sub>2</sub> -                                               | 0.7                 |
| 73       | C              | <i>i</i> -PrNH(CH <sub>2</sub> ) <sub>2</sub> -                                     | 0.7                 |
| 74       | C              | <i>c</i> -PrCH <sub>2</sub> NH(CH <sub>2</sub> ) <sub>2</sub> -                     | 0.5                 |
| 75 #     | C              | <i>c</i> -BuNH(CH <sub>2</sub> ) <sub>2</sub> -                                     | 0.5                 |
| 76       | C              | PrNH(CH <sub>2</sub> ) <sub>2</sub> -                                               | 0.6                 |
| 77       | C              | <i>i</i> -BuNH(CH <sub>2</sub> ) <sub>2</sub> -                                     | 0.5                 |
| 78 #     | C              | BuNH(CH <sub>2</sub> ) <sub>2</sub> -                                               | 0.4                 |

Table S3. Cont.

| Compound | R <sub>1</sub>                                                                      | R <sub>2</sub>                                                                                                        | K <sub>i</sub> (nM) |
|----------|-------------------------------------------------------------------------------------|-----------------------------------------------------------------------------------------------------------------------|---------------------|
| 79       | C                                                                                   | Et <sub>2</sub> N(CH <sub>2</sub> ) <sub>2</sub> -                                                                    | 1.0                 |
| 80       | C                                                                                   | 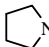 N-(CH <sub>2</sub> ) <sub>2</sub> - | 2.3                 |
| 81 #     | D                                                                                   | Pr-                                                                                                                   | 5.4                 |
| 82       | D                                                                                   | CH <sub>3</sub> C(O)CH <sub>2</sub> -                                                                                 | 4.5                 |
| 83       | D                                                                                   | HO(CH <sub>2</sub> ) <sub>2</sub> -                                                                                   | 1.7                 |
| 84       | D                                                                                   | CH <sub>3</sub> NH(CH <sub>2</sub> ) <sub>2</sub> -                                                                   | 2.1                 |
| 85       | D                                                                                   | EtNH(CH <sub>2</sub> ) <sub>2</sub> -                                                                                 | 1.6                 |
| 86 #     | D                                                                                   | <i>i</i> -PrNH(CH <sub>2</sub> ) <sub>2</sub> -                                                                       | 1.4                 |
| 87       | D                                                                                   | <i>c</i> -PentylNH(CH <sub>2</sub> ) <sub>2</sub> -                                                                   | 0.9                 |
| 88       | D                                                                                   | <i>c</i> -HexylNH(CH <sub>2</sub> ) <sub>2</sub> -                                                                    | 0.9                 |
| 89       | D                                                                                   | PrNH(CH <sub>2</sub> ) <sub>2</sub> -                                                                                 | 1.0                 |
| 90 #     | D                                                                                   | CH <sub>2</sub> =CHCH <sub>2</sub> NH(CH <sub>2</sub> ) <sub>2</sub> -                                                | 0.9                 |
| 91       | D                                                                                   | <i>c</i> -BuNH(CH <sub>2</sub> ) <sub>2</sub> -                                                                       | 1.5                 |
| 92 #     | D                                                                                   | <i>c</i> -PrCH <sub>2</sub> NH(CH <sub>2</sub> ) <sub>2</sub> -                                                       | 0.8                 |
| 93       | D                                                                                   | <i>i</i> -BuNH(CH <sub>2</sub> ) <sub>2</sub> -                                                                       | 0.5                 |
| 94       | D                                                                                   | ( <i>i</i> -Pr) <sub>2</sub> NH(CH <sub>2</sub> ) <sub>2</sub> -                                                      | 6.7                 |
| 95       | D                                                                                   | 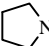 N-(CH <sub>2</sub> ) <sub>2</sub> - | 1.4                 |
| 96       | D                                                                                   | BuNH(CH <sub>2</sub> ) <sub>2</sub> -                                                                                 | 0.5                 |
| 97       | D                                                                                   | <i>i</i> -AmylNH(CH <sub>2</sub> ) <sub>2</sub> -                                                                     | 0.4                 |
| 98       | D                                                                                   | <i>c</i> -HexylCH <sub>2</sub> NH(CH <sub>2</sub> ) <sub>2</sub> -                                                    | 0.7                 |
| 99       | D                                                                                   | BnNH(CH <sub>2</sub> ) <sub>2</sub> -                                                                                 | 3.6                 |
| 100      | 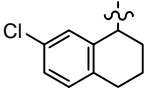  | E                                                                                                                     | 15.9                |
| 101      | 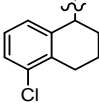 | E                                                                                                                     | 1.8                 |
| 102      | 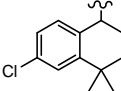 | E                                                                                                                     | 0.6                 |
| 103      | 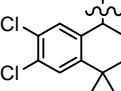 | E                                                                                                                     | 12.2                |

# Molecules belonging to the test set.
